# Supplementary material for: Whole genome sequencing reveals population diversity and variation in HIV-1 specific host genes
Source: Front Genet. 2023 Dec 20;14:1290624. doi: 10.3389/fgene.2023.1290624 (PMC10765519; doi:10.3389/fgene.2023.1290624)
Supplement: Supplementary file 1 [file Table3.XLSX]

## Sheet: Sheet1
Supplementary Table 3. Human genes previously associated with HIV-1.
A4GALT
ABCB1
ABCF2
ABO
ABTB2
AC005062.1
AC006305.1
AC009132.1
AC009229.1
AC009271.7
AC010476.2
AC010519.1
AC010998.3
AC011306.1
AC013727.1
AC018880.2
AC021573.1
AC022483.1
AC023798.16
AC023950.6
AC025614.2
AC026341.1
AC026371.1
AC034229.1
AC037459.4
AC044836.1
AC062039.1
AC063952.2
AC073475.1
AC087190.5-2
AC087854.1
AC091905.4
AC092745.2
AC092745.5
AC093801.2
AC095058.3
AC096719.1
AC097652.1
AC099795.1
AC100812.1
AC103881.1
AC104232.2
AC105916.1
AC114322.1
AC115283.1
AC116362.1
AC126407.1
ACTR3BP6
ADAM10
ADAM18
ADAMTS1
ADH5P4
AE01
AF233439.1
AGAP2
AGBL5
AJ239318.1
AJ239321.1
AKR7A2
AKT1
AL008729.1
AL031315.1
AL035246.1
AL035461.3
AL096854.1
AL136363.2
AL138752.2
AL138889.1
AL161781.1
AL353743.2
AL354694.1
AL358787.1
AL359382.2
AL390763.1
AL391500.13
AL391832.4
AL451007.2
AL451127.2
AL512329.2
AL513164.1
AL591509.5
AL671762.1
AL671883.2
AL671883.3
ALK
ALKBH8
ANKRD22
ANKRD30A
ANKRD43
ANKRD6
ANKRD9
ANXA1
AOAH
AP001021.1
AP001021.3
AP003398.2
AP003464.1
AP2M1
APOBEC3
APOBEC3B
APOBEC3G
ARF1
ARGLU1
ARHGAP32
ARHGEF12
ARHGEF19
ARPC1A
ASXL2
ATG12
ATG16L2
ATG7
ATP6V0A1
BAHD1
BCL9
BICRA
BIRC4BP
BOD1P
BRWD2
BSDC1
BTNL2
BUD13
BX323046.2
C10orf11
C10orf71
C1ORF103
C21orf96
C3ORF56
C4orf17
C6ORF1
C6orf106
C6orf15
C6orf48
C7orf58
CACNG1
CADM1
CADPS
CAPN6
CARD16
CAV2
CBS
CCBE1
CCDC134
CCL11
CCL17
CCL18
CCL2
CCL3
CCL3L1
CCL4
CCL5
CCNG1
CCNT1
CCR2
CCR5
CCRL2
CCT8L2
CD209
CD247
CD33
CD4
CDCA7L
CDSN
CHORDC1
CHRNA3
CHRNA5
CIG-5
CLDND1
CLEC18B
CLN3
CLNS1A
CMPK2
CMTM8
COG2
COG3
COG4
COLEC11
COX10-AS1
COX6A1P3
CREB5
CREBBP
CRIPAK
CRTC2
CRTC3
CSPP1
CTDP1
CTLA4
CUL5
CUX2
CX3CR1
CXCL10
CXCL11
CXCL12
CXCL9
CXCR4
CXCR6
CYP1B1-AS1
CYP3A4
CYP7B1
CYPA
CYYR1
DAB1
DARC
DC-SIGN
DCK
DDEF2
DDOST
DDR1
DDX10
DDX3X
DDX40
DDX53
DDX55
DEFB1
DEPDC5
DEPDC6
DEPTOR
DHFRP2
DHX33
DIMT1L
DISC1FP1
DMXL1
DNAJB1
DNAJC18
DNAJC27
DNAJC5B
DNAL1
DOK6
DPCR1
DPM1
DPY19L3
DPYD
DRGX
DYRK1A
DYSF
ECR777
EDNRA
EFEMP1
EFHC2
EGF
EGFR
EIF2C3
EIF3H
EPHA5
EPS8
ERCC3
ERI2
ERP27
ETF1
ETHE1
EVI5L
EXOSC3
EXOSC5
FA2H
FAM174B
FAM200B
FAM229A
FAM5B
FAM76B
FANCL
FAS
FASLG
FBN3
FBXO10
FBXO18
FBXO21
FBXW11
FCGR2A
FGD6
FGF1
FHL3
FKBP1AP4
FLII
FNTA
FOXCUT
FOXN3
FRMPD1
FUT2
FUT9
GABARAP
GALNT14
GAPVD1
GBAS
GBP1
GCK
GFRAL
GLRX3
GLTSCR1
GNPDA2
GOLPH3
GOSR2
GPC5
GPR156
GRIN2A
GRM5
GRTP1
GZMH
H3F3A
HAP1
HB1
HCG22
HCP5
HCP5HCP5
HCP5P2
HCRTR2
HEATR1
HGS
HIBCH
HIP1R
HIST1H3B
HIST1H3C
HIST1H4A
HIST1H4B
HIV-1
HLA-A
HLA-B
HLA-B57
HLA-C
HLA-DPA1
HLA-DQA1
HLA-DQB1
HLA-DRA
HLA-E
HLA-G
HMGXB3
HNRNPF
HS3ST3A1
HS6ST2
HSP90AB3P
HTATSF1
HUWE1
IDH1
IER3
IFI44
IFI6
IFIT3
IFNAR1
IFNG
IFNGR1
IGHMBP2
IGHV1-12
IGHV1OR21-1
IGHV3-13
IGHV3-52
IGHV3-53
IGSF21
IKBKG
IL10
IL10RA
IL12A
IL12B
IL13
IL2
IL2RA
IL32
IL4
IL4R
IL6
INTS7
IPO8
IQCA1L
IQUB
IRF4
ISG43
ITPKA
JAK1
JHDM1D
JUP
KAT2A
KB-67B5.12
KBTBD7
KCNIP1
KCNIP3
KCNK9
KCNMB3P1
KCNQ5
KDM3B
KDM4C
KDM4D
KEL
KERA
KIAA1012
KIF3C
KIF4B
KIR
KIR3DL1
KLHDC2
KLHL1
KTN1
LAPTM5
LARS
LARS2
LCP2
LEFTY1
LENG1
LINC00836
LINC00937
LINC00992
LINC01150
LINC01556
LINC01985
LINC02177
LINC02240
LINC02364
LINC02374
LINC02477
LINC02646
LINC02647
LINC02667
LINC02702
LINC02748
LNX2
LOC100129699
LOC375190
LPL
LRMDA
LRP4
LRRC58
LRRC8D
LSM3
LY6D
LYPD4
MAD2L1
MAGI1
MAP4
MBL2
MBNL2
MCM8
MDN1
MED14
MED28
MED4
MED6
MED7
MEPE
MESTP3
MGAT1
MICA
MICB
MID1IP1
MIR1275
MIR6891
MIR8074
MKI67
MKRN2
MKRN3
MMADHC
MND1
MOB1B
MOS
MPHOSPH6
MR1
NAV2
NBEA
NBPF13P
NCBP2
NCBP2-AS1
NCBP2-AS2
NCOR2
NDUFB7
NEDD9
NF2
NGLY1
NIPSNAP3B
NKG7
NLRP1
NMT1
NOS3
NOTCH4
NR0B2
NTM
NTM-AS1
NUFIP1P1
NUP107
NUP133
NUP153
NUP155
NUP160
NUP85
OAS1
OAS2
OASL
ODZ4
OTUD3
PABPC1P2
PANK1
PARD3B
PAX5
PBX1
PC
PCDH11X
PCNT
PDCD5
PDE7A
PDIA6
PHACTR1
PHF12
PHF3
PIGH
PIGK
PIGY
PIGZ
PIP5K1C
PKD1L2
PLD5
PLEKHA3
PLOD3
PM20D1
PNRC1
POLR3A
POLR3F
POU1F1
POU2F1
POU5F1
PP2672
PPIA
PPIAP33
PPIB
PPP1CB
PPP2R2A
PPP3CC
PQLC2
PRDM10
PRDM14
PRDM7
PRF1
PRKG2
PRKX
PROX1
PROX1-AS1
PSME2
PSORS1C1
PSORS1C3
PURA
RAB1B
RAB28
RAB2A
RAB6A
RAB6B
RAB6C
RABEPK
RANBP1
RANBP2
RAP1B
RAP1GAP2
RAPGEF1
RAPGEF2
RELA
RGCC
RGP1
RHOH
RICH2
RIMS4
RN7SKP199
RN7SL492P
RNA5SP407
RNA5SP408
RNF130
RNF170
RNF212
RNF26
RNF39
RNU105C
RNU6-1133P
RNU6-737P
RNU6-931P
RP11-100A16.1
RP11-707M13.1
RPL13AP15
RPL15P15
RPL19P16
RPL21P119
RPL21P126
RPL21P75
RPL23AP96
RPL28P3
RPL32P3
RPL4P5
RPS6KA2
RPSAP40
RPTN
RRAGB
RSAD2
RSL1D1
RTN2
RUNX1
RUSC2
RXRG
SAMD5
SCFD1
SCGB1D4
SCGB2A2
SDC1
SDC2
SDF1
SEC14L1
SERPINA1
SESTD1
SFT2D1
SGCD
SIGLEC17P
SIGLEC22P
SILC1
SIP1
SLC2A1
SLC2A1-AS1
SLC35F4
SLC46A1
SLC9A9
SLCO5A1
SMC4P1
SMIM12
SNHG32
SNN
SNRPEP6
SORBS3
SOX11
SOX5
SP110
SPAST
SPATS2L
SPCS3
SPDYA
SPOCK1
SPRY4-AS1
SPTAN1
SPTBN1
SSB
ST14
ST3GAL5
ST8SIA3
STAC2
STARD3NL
STAT1
STT3A
STX11
STX5
SUGCT
SUV420H1
TAOK1
TAP2
TBC1D7
TCEB3
TFAP4
TFDP2
TFE3
TGFBRAP1
THAP3
THOC2
THRAP3P1
THSD7B
TIAM2
TIMM8A
TLR7
TLR8
TLR9
TM9SF2
TMC4
TMED2
TMEFF2
TMEM132C
TMEM163
TMEM181
TMEM182
TMEM230
TMTC1
TNF
TNPO3
TNS1
TNXB
TOMM70A
TOR2A
TRAPPC1
TRIB1
TRIM10
TRIM27
TRIM5
TRIM55
TRIM58
TRMT5
TRPM6
TSBP1-AS1
TSSK3
TUBAL3
TXNL3
UBQLN4
UBQLN4P1
UGT1A11P
UGT1A12P
USP18
USP26
USP6
VANGL2
VAV2
VEGFC
VPRBP
VPS53
VWC2L
WASF5P
WDR27
WDR59
WDTC1
WNK1
WNT1
XAF1
XKR4
YPEL2
YTHDC2
ZBTB2
ZBTB20
ZBTB7C
ZCCHC7
ZDHHC19
ZFP90
ZNF12
ZNF182
ZNF354A
ZNF385D
ZNF436
ZNF512B
ZNF536
ZNF704
ZNF720
ZNF785
ZNF791
ZNF804A
ZNF831
ZNF90
ZNRD1
ZNRD1AS
ZNRD1ASP
