# Supplementary material for: Whole genome sequencing reveals population diversity and variation in HIV-1 specific host genes
Source: Front Genet. 2023 Dec 20;14:1290624. doi: 10.3389/fgene.2023.1290624 (PMC10765519; doi:10.3389/fgene.2023.1290624)
Supplement: Supplementary file 5 [file Table6.XLSX]

## Sheet: Table S3
Supplementary Table 6. The most deleterious (damaging) variants as predicted by at least 10 databases in ANNOVAR
CHR	POS	SNP	REF/ALT	dbSNP ; gnomAD	cDNA change	AA change	Gene	FATHHM	FATHHM_pred	Siphy_29way	CADD	CADD_phred	BW_AF	1000Genomes_AF	gnomAD_AFR_AF	gnomAD_EU_AF
1	1184029	rs111377341	C/G,T	C/G,T	exon8:c.C979G	p.R327G	TTLL10	2.25	T	11.689	4.021	20.6	0.033,0.005141	.	0.000309112,0.00076089	0,1.54851e-05
1	3022425	rs3795263	G/A,C	G/A,C	exon1:c.G739A	p.G247R	ACTRT2	-4.24	D	11.17	3.03	16.11	0.001289,0.003866	A=0.122005	0.0441905	0.236254
1	8863242	.	G/A,T	G/C	exon7:c.C890A	p.T297N	ENO1	0.57	T	18.297	4.851	27.7	0.001282,0.001282	.	0	1.54856e-05
1	47140895	rs61507155	A/T,C	A/C,T	exon2:c.A311T	p.Y104F	CYP4A22	-0.27	T	5.486	3.298	17.08	0.035,0.001282	T=0.022564	0.0645445	0.000325198
1	205844819	rs374784539	C/A,G	C/G	exon4:c.G568C	p.D190H	PM20D1	2.66	T	19.649	3.698	18.79	0.001282,0.002564	.	4.75692e-05	0
2	176100737	rs200302685	G/C,A	G/A,C,T	exon2:c.G790C	p.E264Q	HOXD12	-3.22	D	19.976	5.337	34	0.032,0.002564	.	0.000641818,0.000380337,2.3771e-05	0.000139336,9.28908e-05,0.000216745
2	195906730	rs168192	G/T,C	G/A,C,T ; G/T	exon27:c.C4264G	p.P1422A	DNAH7	2.45	T	17.963	3.481	17.81	0.094,0.003846	T=0.014976	0.049666	0.000372151
4	95841276	rs17024795	C/G,A	C/G,T	exon1:c.C1126G	p.R376G	PDHA2	-1.23	T	10.855	2.426	14.07	0.027,0.001282	G=0.01617	0.0407337,0	0.0000309809,1.54904e-05
4	150599048	rs111883007	G/C,A	G/C	exon38:c.C6005G	p.S2002W	LRBA	0.31	T	19.872	4.253	22.2	0.005128,0.001282	.	0	0
4	154234762	rs61746111	G/A,T	G/A,C,T ; G/A,T	exon25:c.C8525A	p.P2842Q	DCHS2	0.39	T	20.346	3.502	17.9	0.032,0.003846	A=0.01258	0.0370177,0.00335395	0.000154895,1.54895e-05
5	83512337	rs183969050	T/C,G	T/C	c.T983G	p.F328S	VCAN	3.1	T	10.479	3.525	18	0.013,0.001282	0.000399	0.000356888	0
5	90652411	rs147062294	C/G,T	C/G	exon19:c.C3482G	p.S1161C	ADGRV1	1.37	T	20.672	5.347	34	0.014,0.001282	0.006989	0.0149374	0.000108416
6	43675226	rs35480020	G/C,A	G/A,C	exon5:c.C422G	p.P141R	MRPS18A	.	.	12.36	3.364	17.34	0.022,0.001282	C=0.010783	0,0.0353417	0.0000154866,0.000278759
7	20727068	rs111647033	G/A,C	G/A,C	exon13:c.G1319C	p.R440P	ABCB5	-2.92	D	15.611	3.94	20.1	0.026,0.002564	C=0.000399	0.000523585,0.00218954	0,0
7	134538257	rs142388608	C/G,T	C/G,T	exon8:c.C805G	p.R269G	AKR1B10	1.69	T	11.869	2.874	15.57	0.007692,0.001282	G=0.000799	0.000214133,0.000118963	0.000139371,0.000185828
8	24487298	rs146451180	G/A,T	G/A	exon11:c.G1072A	p.V358M	ADAM7	1.48	T	9.477	2.594	14.63	0.001282,0.002564	0.003395	0.000499762	0.00142455
11	4946887	rs2412467	C/T,G	C/G,T ; C/T	exon1:c.G214A	p.D72N	OR51A4	5.21	T	14.304	3.733	18.96	0.002564,0.001282	T=0.01478	0.0168363	0.038437
11	6891758	.	A/C,T	.	exon1:c.T743A	p.V248D	OR2D2	7.78	T	13.213	3.744	19.01	0.002564,0.003846	.	.	.
12	52775400	rs149569624	T/A,C	T/A,C	exon2:c.A803T	p.D268V	KRT76	-1.07	T	14.612	4.336	22.8	0.01,0.012	C=0.003395	0.00497004,0.00998811	0,4.64626e-05
14	20641145	rs148281603	C/G,A	C/A,G,T ; C/G,T	exon1:c.G547C	p.D183H	OR6S1	8.55	T	13.924	3.842	19.52	0.013,0.007692	T=0.0002	0.00107112,7.14082e-05	0,0
15	49972713	rs77004004	G/C,T	G/C,T	exon13:c.C1112A	p.P371H	ATP8B4	-2.39	D	8.864	2.478	14.25	0.04,0.019	T=0.003794	0.0000238243,0.0132463	0,0
16	48139198	rs113496237	C/T,G	C/G,T	exon5:c.G796C	p.G266R	ABCC12	-2.63	D	15.741	3.789	19.24	0.021,0.013	.	0.0000714184,2.38061e-05	0,0
17	3292209	rs703903	C/T,A	C/A,T	exon1:c.G374T	p.R125L	OR3A1	-1.09	T	17.71	5.033	29.8	0.16,0.001282	T=0.446885	0.0132319,0.295096	0.000077553,0.542611
20	35801566	.	T/A,G	.	exon2:c.T44A	p.V15E	PHF20	1.18	T	15.004	4.464	23.8	0.001282,0.001282	.	.	.
