# Supplementary material for: Whole genome sequencing reveals population diversity and variation in HIV-1 specific host genes
Source: Front Genet. 2023 Dec 20;14:1290624. doi: 10.3389/fgene.2023.1290624 (PMC10765519; doi:10.3389/fgene.2023.1290624)
Supplement: Supplementary file 9 [file Table8.XLS]

## Sheet: HIV.all.gene
Supplementary Table 8: Gene-specific SNPs Frequencies across populations
Gene	BW_HIV+.frq	BW_HIV-.frq	European_center.frq	European_North.frq	European_South.frq	European_USA.frq	Khoe-San.frq	Niger_Congo_Bantu_Center.frq	Niger-Congo_Bantu_South.frq	Niger_Congo_Volta.frq	Niger_Congo_West.frq	East_Asian.frq	South_Asian.frq	UK_South_Asian.frq	USA_Indian.frq
SCFD1	0.199	0.2	0.137	0.179	0.194	0.147	0.192	0.201	0.202	0.188	0.2	0.184	0.179	0.2	0.208
ZDHHC19	0.179	0.184	0.178	0.174	0.18	0.158	0.172	0.188	0.187	0.192	0.18	0.184	0.179	0.179	0.176
LAPTM5	0.194	0.2	0.243	0.256	0.254	0.249	0.168	0.199	0.2	0.201	0.197	0.222	0.223	0.218	0.225
IFNAR1	0.161	0.176	0.187	0.203	0.203	0.196	0.16	0.192	0.184	0.186	0.191	0.185	0.193	0.19	0.193
DDX55	0.194	0.174	0.172	0.099	0.15	0.159	0.222	0.213	0.2	0.201	0.273	0.046	0.148	0.124	0.159
GAPVD1	0.217	0.214	0.25	0.304	0.314	0.304	0.188	0.202	0.199	0.204	0.226	0.296	0.31	0.295	0.292
SAMD5	0.195	0.198	0.181	0.173	0.182	0.181	0.183	0.2	0.196	0.198	0.194	0.174	0.184	0.187	0.185
NBEA	0.181	0.183	0.125	0.13	0.114	0.133	0.189	0.179	0.187	0.175	0.176	0.139	0.152	0.159	0.16
GABARAP	0.214	0.209	0.143	0.135	0.105	0.135	0.155	0.217	0.226	0.191	0.211	0.116	0.131	0.106	0.123
RPTN	0.161	0.16	0.132	0.102	0.15	0.137	0.124	0.188	0.136	0.159	0.194	0.17	0.181	0.163	0.182
ARHGEF12	0.239	0.239	0.254	0.29	0.271	0.267	0.234	0.253	0.254	0.257	0.233	0.184	0.261	0.265	0.273
DYSF	0.211	0.208	0.17	0.175	0.167	0.178	0.196	0.21	0.213	0.205	0.206	0.155	0.189	0.196	0.191
IFNG	0.162	0.177	0.267	0.299	0.247	0.289	0.129	0.191	0.193	0.186	0.165	0.166	0.231	0.214	0.243
ARHGEF19	0.201	0.195	0.216	0.193	0.22	0.181	0.257	0.212	0.19	0.199	0.216	0.121	0.255	0.28	0.244
PPP2R2A	0.177	0.175	0.196	0.196	0.208	0.196	0.152	0.175	0.176	0.18	0.184	0.193	0.202	0.198	0.188
GALNT14	0.228	0.226	0.221	0.216	0.205	0.209	0.224	0.228	0.224	0.227	0.229	0.214	0.215	0.203	0.227
CXCL12	0.186	0.196	0.165	0.147	0.166	0.167	0.169	0.204	0.188	0.203	0.205	0.117	0.156	0.157	0.144
WDTC1	0.201	0.213	0.118	0.115	0.106	0.1	0.219	0.159	0.196	0.235	0.24	0.062	0.106	0.115	0.119
TRAPPC1	0.285	0.283	0.318	0.339	0.299	0.325	0.206	0.31	0.296	0.323	0.305	0.148	0.226	0.257	0.236
ERI2	0.189	0.172	0.18	0.181	0.205	0.189	0.185	0.181	0.188	0.201	0.204	0.19	0.212	0.214	0.223
FBXW11	0.194	0.194	0.058	0.045	0.041	0.045	0.149	0.207	0.204	0.207	0.208	0.026	0.04	0.044	0.037
RAB6A	0.135	0.138	0.139	0.138	0.16	0.149	0.109	0.15	0.133	0.146	0.163	0.123	0.176	0.175	0.176
RAB6B	0.163	0.164	0.189	0.195	0.194	0.187	0.141	0.176	0.163	0.171	0.174	0.147	0.201	0.206	0.203
RAB6C	0.246	0.242	0.112	0.134	0.126	0.109	0.253	0.261	0.243	0.261	0.26	0.18	0.146	0.131	0.113
EDNRA	0.241	0.242	0.142	0.102	0.149	0.133	0.211	0.207	0.235	0.204	0.208	0.152	0.197	0.227	0.193
IFIT3	0.214	0.23	0.211	0.213	0.226	0.228	0.276	0.242	0.23	0.224	0.266	0.175	0.193	0.181	0.19
TMEM132C	0.22	0.222	0.149	0.146	0.153	0.153	0.213	0.221	0.218	0.22	0.217	0.145	0.154	0.155	0.156
HIP1R	0.234	0.234	0.053	0.105	0.083	0.067	0.204	0.21	0.227	0.193	0.21	0.158	0.163	0.154	0.136
PANK1	0.152	0.165	0.23	0.235	0.243	0.233	0.179	0.187	0.162	0.195	0.197	0.237	0.234	0.237	0.226
RUSC2	0.189	0.196	0.176	0.193	0.182	0.152	0.173	0.207	0.208	0.21	0.208	0.196	0.194	0.213	0.214
HCG22	0.03	0.032	0.331	0.333	0.336	0.333	0.306	0.281	0.296	0.272	0.284	0.335	0.328	0.341	0.33
SOX11	0.278	0.291	0.256	0.196	0.266	0.206	0.302	0.265	0.266	0.283	0.292	0.314	0.258	0.248	0.257
NF2	0.155	0.164	0.248	0.218	0.252	0.244	0.144	0.185	0.149	0.172	0.157	0.216	0.194	0.182	0.19
H3F3A	0.269	0.254	0.106	0.135	0.119	0.132	0.237	0.268	0.267	0.266	0.249	0.126	0.098	0.081	0.094
JAK1	0.224	0.229	0.115	0.139	0.114	0.121	0.226	0.237	0.233	0.228	0.229	0.231	0.146	0.171	0.146
GRM5	0.198	0.202	0.144	0.144	0.135	0.159	0.188	0.204	0.203	0.204	0.203	0.165	0.123	0.111	0.131
KCNIP3	0.223	0.209	0.223	0.221	0.161	0.215	0.353	0.156	0.22	0.114	0.154	0.31	0.229	0.216	0.197
PABPC1P2	0.157	0.159	0.058	0.048	0.043	0.045	0.187	0.207	0.178	0.137	0.127	0.114	0.087	0.1	0.104
VPRBP	0.124	0.115	0.062	0.054	0.058	0.044	0.098	0.105	0.113	0.155	0.089	0.25	0.084	0.08	0.086
TFAP4	0.184	0.184	0.291	0.284	0.303	0.296	0.141	0.222	0.21	0.235	0.232	0.173	0.273	0.284	0.287
SFT2D1	0.194	0.207	0.19	0.2	0.215	0.207	0.151	0.211	0.216	0.2	0.202	0.193	0.175	0.187	0.18
GZMH	0.186	0.191	0.112	0.109	0.107	0.114	0.153	0.185	0.21	0.199	0.192	0.11	0.103	0.105	0.1
PPIB	0.273	0.274	0.045	0.032	0.049	0.044	0.212	0.279	0.178	0.257	0.258	0.025	0.107	0.109	0.108
PRDM7	0.171	0.179	0.124	0.149	0.075	0.11	0.188	0.185	0.169	0.165	0.172	0.136	0.149	0.133	0.132
GOSR2	0.225	0.222	0.23	0.267	0.259	0.261	0.238	0.217	0.233	0.23	0.219	0.237	0.28	0.269	0.274
NUP133	0.202	0.199	0.098	0.091	0.126	0.11	0.203	0.222	0.215	0.215	0.213	0.094	0.087	0.088	0.085
OTUD3	0.134	0.141	0.152	0.152	0.143	0.15	0.121	0.133	0.131	0.126	0.116	0.073	0.099	0.107	0.115
RAP1B	0.253	0.203	0.096	0.088	0.108	0.101	0.082	0.192	0.177	0.178	0.18	0.112	0.126	0.135	0.133
ZNF831	0.2	0.196	0.137	0.155	0.132	0.118	0.197	0.199	0.194	0.199	0.208	0.141	0.123	0.121	0.125
TRIM58	0.194	0.193	0.154	0.17	0.168	0.157	0.182	0.204	0.195	0.199	0.21	0.154	0.146	0.157	0.171
TRIM55	0.205	0.202	0.068	0.05	0.056	0.057	0.156	0.211	0.208	0.211	0.21	0.03	0.037	0.033	0.034
NEDD9	0.19	0.193	0.17	0.185	0.176	0.176	0.191	0.195	0.196	0.193	0.199	0.13	0.159	0.155	0.156
ARF1	0.176	0.169	0.118	0.121	0.113	0.113	0.136	0.177	0.182	0.19	0.198	0.137	0.119	0.1	0.104
TM9SF2	0.134	0.148	0.099	0.091	0.092	0.084	0.121	0.143	0.153	0.14	0.13	0.097	0.116	0.121	0.115
RIMS4	0.198	0.198	0.151	0.129	0.159	0.159	0.183	0.211	0.2	0.215	0.207	0.176	0.188	0.185	0.199
SPATS2L	0.184	0.199	0.222	0.23	0.227	0.224	0.204	0.17	0.186	0.145	0.181	0.179	0.226	0.221	0.229
SP110	0.222	0.228	0.183	0.169	0.189	0.182	0.239	0.234	0.243	0.208	0.213	0.179	0.23	0.259	0.229
RNF26	0.201	0.197	0.261	0.271	0.276	0.268	0.163	0.236	0.219	0.218	0.216	0.139	0.123	0.117	0.135
STARD3NL	0.197	0.202	0.229	0.218	0.222	0.231	0.203	0.194	0.188	0.192	0.205	0.23	0.235	0.242	0.238
IL2RA	0.167	0.162	0.204	0.196	0.196	0.197	0.161	0.167	0.163	0.169	0.171	0.163	0.184	0.187	0.184
GPR156	0.141	0.142	0.14	0.148	0.141	0.132	0.147	0.165	0.15	0.175	0.157	0.159	0.179	0.178	0.19
APOBEC3G	0.208	0.209	0.179	0.187	0.167	0.161	0.204	0.234	0.219	0.237	0.234	0.114	0.134	0.154	0.147
APOBEC3B	0.143	0.147	0.17	0.163	0.193	0.191	0.159	0.171	0.149	0.154	0.174	0.199	0.18	0.187	0.185
CRIPAK	0.152	0.149	0.254	0.244	0.226	0.244	0.193	0.147	0.151	0.131	0.134	0.094	0.182	0.183	0.195
SPCS3	0.167	0.169	0.116	0.114	0.134	0.133	0.226	0.134	0.122	0.133	0.161	0.063	0.093	0.085	0.071
EGFR	0.178	0.182	0.163	0.174	0.161	0.167	0.163	0.174	0.175	0.179	0.182	0.103	0.176	0.175	0.172
RAB2A	0.197	0.203	0.118	0.199	0.187	0.167	0.175	0.212	0.202	0.213	0.21	0.213	0.219	0.219	0.218
EPS8	0.214	0.211	0.034	0.03	0.042	0.031	0.187	0.212	0.203	0.215	0.205	0.048	0.038	0.024	0.027
ZNF12	0.205	0.214	0.07	0.102	0.094	0.084	0.2	0.212	0.225	0.215	0.215	0.103	0.118	0.125	0.118
DDX10	0.118	0.116	0.134	0.205	0.167	0.155	0.131	0.131	0.116	0.124	0.131	0.204	0.175	0.197	0.183
SLCO5A1	0.196	0.189	0.168	0.168	0.165	0.17	0.16	0.189	0.195	0.184	0.191	0.151	0.171	0.17	0.17
CXCR6	0.193	0.178	0.17	0.161	0.192	0.174	0.194	0.196	0.191	0.178	0.174	0.177	0.157	0.157	0.142
CXCR4	0.141	0.146	0.141	0.129	0.086	0.121	0.218	0.182	0.152	0.136	0.129	0.007	0.097	0.089	0.076
NOS3	0.21	0.205	0.187	0.158	0.19	0.173	0.173	0.203	0.204	0.204	0.206	0.153	0.176	0.18	0.162
HEATR1	0.234	0.237	0.176	0.16	0.229	0.209	0.217	0.247	0.217	0.231	0.218	0.275	0.285	0.284	0.273
MND1	0.253	0.252	0.167	0.137	0.157	0.179	0.225	0.273	0.246	0.268	0.258	0.177	0.223	0.232	0.236
HGS	0.181	0.179	0.118	0.084	0.14	0.126	0.149	0.157	0.173	0.131	0.12	0.169	0.109	0.102	0.095
RTN2	0.155	0.161	0.182	0.201	0.182	0.19	0.133	0.181	0.15	0.172	0.178	0.205	0.205	0.206	0.203
ABO	0.251	0.247	0.221	0.198	0.217	0.229	0.288	0.26	0.26	0.256	0.272	0.268	0.246	0.272	0.238
IL32	0.257	0.257	0.212	0.223	0.214	0.214	0.231	0.255	0.255	0.247	0.244	0.173	0.215	0.229	0.217
LCP2	0.235	0.239	0.205	0.209	0.193	0.201	0.221	0.233	0.231	0.232	0.242	0.161	0.2	0.2	0.205
POU1F1	0.201	0.206	0.304	0.312	0.264	0.3	0.229	0.211	0.175	0.174	0.218	0.295	0.307	0.29	0.309
SLC35F4	0.197	0.201	0.167	0.16	0.177	0.179	0.188	0.213	0.203	0.208	0.213	0.185	0.195	0.197	0.194
DMXL1	0.162	0.164	0.115	0.103	0.113	0.116	0.159	0.164	0.177	0.157	0.16	0.042	0.099	0.106	0.112
RAB28	0.265	0.252	0.037	0.03	0.031	0.026	0.322	0.219	0.168	0.134	0.179	0.019	0.03	0.028	0.026
CMTM8	0.193	0.194	0.183	0.185	0.178	0.176	0.18	0.197	0.197	0.202	0.202	0.192	0.175	0.171	0.157
FUT2	0.339	0.343	0.285	0.202	0.273	0.253	0.321	0.343	0.333	0.35	0.346	0.031	0.197	0.156	0.161
PPP3CC	0.222	0.221	0.229	0.237	0.238	0.234	0.193	0.252	0.227	0.244	0.241	0.228	0.243	0.248	0.22
DNAL1	0.101	0.104	0.157	0.15	0.15	0.172	0.105	0.111	0.099	0.111	0.116	0.064	0.096	0.092	0.107
SESTD1	0.239	0.231	0.167	0.161	0.197	0.132	0.183	0.261	0.241	0.269	0.254	0.089	0.226	0.222	0.218
DAB1	0.225	0.223	0.204	0.205	0.205	0.201	0.209	0.226	0.221	0.222	0.227	0.165	0.189	0.18	0.18
EGF	0.185	0.186	0.164	0.153	0.157	0.158	0.171	0.196	0.188	0.203	0.198	0.204	0.203	0.201	0.193
MICA	0.073	0.064	0.068	0.024	0.039	0.051	0.069	0.077	0.068	0.076	0.096	0.043	0.048	0.065	0.129
EIF3H	0.158	0.172	0.145	0.15	0.128	0.135	0.144	0.178	0.154	0.18	0.169	0.184	0.186	0.149	0.177
MR1	0.266	0.271	0.234	0.22	0.222	0.226	0.224	0.272	0.242	0.265	0.274	0.23	0.228	0.207	0.219
DYRK1A	0.189	0.196	0.174	0.193	0.187	0.182	0.178	0.223	0.211	0.218	0.212	0.19	0.211	0.22	0.216
RELA	0.196	0.205	0.127	0.115	0.131	0.129	0.189	0.172	0.181	0.163	0.165	0.168	0.09	0.083	0.088
OR3A1	0.293	0.291	0.238	0.221	0.248	0.246	0.225	0.289	0.281	0.293	0.286	0.108	0.193	0.185	0.212
LEFTY1	0.276	0.253	0.163	0.174	0.167	0.147	0.222	0.242	0.239	0.198	0.221	0.188	0.137	0.148	0.173
LPL	0.19	0.196	0.124	0.117	0.135	0.124	0.19	0.188	0.186	0.183	0.197	0.099	0.107	0.12	0.117
NMT1	0.179	0.181	0.213	0.202	0.211	0.213	0.15	0.194	0.185	0.19	0.194	0.131	0.202	0.201	0.211
FA2H	0.197	0.196	0.165	0.161	0.16	0.155	0.187	0.19	0.191	0.183	0.188	0.137	0.137	0.141	0.149
SNN	0.228	0.22	0.213	0.231	0.221	0.233	0.211	0.21	0.221	0.205	0.214	0.22	0.221	0.224	0.218
PLEKHA3	0.194	0.197	0.113	0.118	0.118	0.101	0.166	0.219	0.188	0.211	0.198	0.197	0.204	0.18	0.177
HCRTR2	0.183	0.182	0.201	0.191	0.2	0.189	0.179	0.188	0.186	0.185	0.184	0.135	0.175	0.182	0.189
CCL2	0.137	0.139	0.231	0.223	0.214	0.218	0.169	0.152	0.128	0.128	0.142	0.212	0.209	0.174	0.175
IL10RA	0.167	0.155	0.121	0.129	0.129	0.124	0.151	0.159	0.147	0.183	0.173	0.144	0.132	0.134	0.128
CCL4	0.214	0.215	0.269	0.247	0.278	0.187	0.256	0.338	0.378	0.307	0.222	0.065	0.278	0.292	0.325
CCL5	0.325	0.298	0.135	0.123	0.106	0.102	0.237	0.395	0.388	0.406	0.382	0.196	0.224	0.232	0.266
NUP85	0.191	0.203	0.083	0.042	0.078	0.065	0.071	0.236	0.246	0.242	0.194	0.088	0.12	0.07	0.052
MED6	0.219	0.217	0.096	0.098	0.124	0.089	0.215	0.215	0.205	0.206	0.206	0.267	0.123	0.142	0.16
MED7	0.155	0.153	0.082	0.082	0.092	0.111	0.162	0.178	0.177	0.18	0.177	0.059	0.088	0.09	0.089
MED4	0.154	0.137	0.127	0.127	0.135	0.109	0.17	0.168	0.131	0.145	0.127	0.177	0.173	0.17	0.163
EXOSC3	0.207	0.21	0.179	0.202	0.156	0.195	0.18	0.21	0.216	0.2	0.214	0.132	0.144	0.137	0.128
VANGL2	0.199	0.198	0.147	0.143	0.182	0.178	0.159	0.204	0.181	0.207	0.212	0.105	0.178	0.183	0.182
DHX33	0.155	0.16	0.155	0.186	0.168	0.136	0.169	0.16	0.144	0.173	0.172	0.152	0.191	0.184	0.196
EXOSC5	0.217	0.221	0.164	0.163	0.18	0.173	0.209	0.202	0.222	0.201	0.208	0.177	0.165	0.16	0.183
MPHOSPH6	0.155	0.16	0.138	0.13	0.144	0.15	0.167	0.179	0.159	0.161	0.164	0.203	0.208	0.204	0.214
ITPKA	0.162	0.161	0.228	0.235	0.226	0.16	0.196	0.197	0.167	0.181	0.155	0.074	0.108	0.154	0.107
PRKG2	0.208	0.216	0.064	0.068	0.088	0.073	0.212	0.211	0.203	0.218	0.217	0.188	0.144	0.162	0.131
TNS1	0.214	0.208	0.153	0.143	0.153	0.146	0.202	0.22	0.21	0.216	0.219	0.173	0.188	0.191	0.184
SLC46A1	0.327	0.326	0.286	0.284	0.311	0.303	0.312	0.28	0.328	0.276	0.263	0.216	0.312	0.332	0.302
GCK	0.159	0.157	0.174	0.166	0.166	0.165	0.154	0.169	0.155	0.164	0.16	0.182	0.137	0.156	0.126
ARGLU1	0.19	0.19	0.189	0.196	0.179	0.179	0.141	0.2	0.172	0.207	0.225	0.161	0.191	0.213	0.218
LARS	0.059	0.055	0.217	0.245	0.179	0.246	0.07	0.068	0.079	0.068	0.069	0.158	0.147	0.156	0.173
DNAH7	0.16	0.163	0.099	0.084	0.099	0.066	0.133	0.176	0.162	0.172	0.167	0.086	0.078	0.085	0.088
IRF4	0.184	0.186	0.131	0.135	0.133	0.141	0.168	0.187	0.195	0.184	0.184	0.19	0.159	0.162	0.165
ATP6V0A1	0.129	0.119	0.131	0.132	0.13	0.138	0.063	0.177	0.141	0.172	0.207	0.123	0.13	0.134	0.118
ALKBH8	0.186	0.185	0.164	0.168	0.16	0.165	0.156	0.195	0.191	0.199	0.189	0.21	0.189	0.185	0.183
DEPDC5	0.182	0.175	0.086	0.097	0.101	0.096	0.171	0.173	0.173	0.162	0.159	0.067	0.11	0.126	0.116
VPS53	0.161	0.165	0.202	0.19	0.203	0.186	0.147	0.173	0.162	0.153	0.154	0.174	0.197	0.189	0.198
TRIM5	0.227	0.232	0.199	0.185	0.211	0.209	0.215	0.236	0.238	0.219	0.226	0.249	0.217	0.218	0.205
TOR2A	0.28	0.276	0.216	0.182	0.233	0.237	0.314	0.192	0.254	0.27	0.242	0.209	0.258	0.259	0.236
SSB	0.199	0.208	0.127	0.138	0.112	0.115	0.206	0.2	0.18	0.194	0.188	0.183	0.175	0.177	0.173
MDN1	0.196	0.188	0.187	0.188	0.19	0.187	0.191	0.181	0.191	0.174	0.188	0.132	0.187	0.187	0.188
KRT76	0.194	0.193	0.123	0.127	0.134	0.123	0.196	0.198	0.188	0.191	0.19	0.2	0.198	0.217	0.207
NLRP1	0.19	0.203	0.148	0.15	0.153	0.147	0.137	0.186	0.179	0.174	0.174	0.101	0.134	0.13	0.141
DNAJB1	0.131	0.151	0.171	0.174	0.18	0.194	0.201	0.189	0.191	0.154	0.187	0.063	0.171	0.172	0.164
ETF1	0.164	0.167	0.209	0.176	0.199	0.203	0.127	0.192	0.184	0.19	0.186	0.104	0.202	0.192	0.178
WDR27	0.19	0.19	0.12	0.129	0.144	0.142	0.202	0.164	0.196	0.158	0.153	0.152	0.182	0.184	0.183
FBXO21	0.103	0.098	0.235	0.217	0.226	0.245	0.141	0.108	0.101	0.112	0.107	0.285	0.244	0.246	0.239
ZNF436	0.2	0.208	0.125	0.133	0.143	0.127	0.19	0.198	0.207	0.185	0.153	0.192	0.241	0.262	0.191
RANBP1	0.164	0.178	0.129	0.136	0.124	0.131	0.15	0.16	0.149	0.168	0.155	0.132	0.151	0.154	0.153
CADM1	0.175	0.175	0.201	0.197	0.206	0.191	0.2	0.178	0.178	0.175	0.16	0.15	0.187	0.18	0.181
FGD6	0.184	0.196	0.174	0.168	0.18	0.204	0.183	0.178	0.189	0.177	0.194	0.193	0.195	0.185	0.175
NUP107	0.144	0.144	0.193	0.194	0.203	0.178	0.132	0.171	0.16	0.161	0.16	0.197	0.195	0.186	0.17
RAB1B	0.086	0.082	0.113	0.102	0.113	0.112	0.074	0.112	0.089	0.118	0.101	0.147	0.173	0.157	0.155
MRPS18A	0.197	0.213	0.063	0.063	0.068	0.056	0.192	0.192	0.171	0.184	0.201	0.157	0.152	0.173	0.142
ENO1	0.183	0.18	0.122	0.102	0.119	0.11	0.16	0.166	0.176	0.181	0.163	0.065	0.153	0.15	0.16
AGAP2	0.117	0.12	0.211	0.217	0.203	0.217	0.137	0.123	0.132	0.133	0.12	0.164	0.184	0.162	0.209
THAP3	0.26	0.244	0.274	0.28	0.266	0.273	0.211	0.27	0.265	0.275	0.273	0.294	0.288	0.285	0.28
GRTP1	0.242	0.234	0.122	0.1	0.117	0.121	0.193	0.221	0.249	0.234	0.232	0.135	0.144	0.142	0.132
TAOK1	0.164	0.171	0.231	0.219	0.227	0.224	0.104	0.161	0.17	0.141	0.139	0.069	0.192	0.201	0.191
KEL	0.267	0.278	0.085	0.097	0.103	0.092	0.346	0.367	0.361	0.328	0.331	0.028	0.041	0.041	0.031
IFI6	0.269	0.268	0.059	0.062	0.071	0.081	0.257	0.251	0.269	0.266	0.262	0.163	0.112	0.091	0.092
CSPP1	0.278	0.262	0.027	0.07	0.03	0.041	0.197	0.23	0.292	0.229	0.245	0.031	0.086	0.069	0.051
STX5	0.166	0.154	0.048	0.073	0.071	0.073	0.177	0.136	0.148	0.179	0.185	0.151	0.112	0.108	0.107
HLA-DPA1	0.377	0.39	0.224	0.064	0.219	0.176	0.412	0.399	0.437	0.35	0.335	0.322	0.359	0.356	0.318
RANBP2	0.182	0.183	0.131	0.133	0.146	0.141	0.176	0.187	0.179	0.188	0.186	0.126	0.142	0.141	0.153
MAD2L1	0.226	0.223	0.236	0.192	0.261	0.273	0.266	0.245	0.229	0.238	0.227	0.127	0.219	0.284	0.286
KTN1	0.147	0.148	0.129	0.143	0.117	0.15	0.157	0.147	0.161	0.137	0.107	0.141	0.17	0.156	0.183
C6ORF106	0.2	0.199	0.125	0.114	0.158	0.137	0.201	0.205	0.203	0.208	0.217	0.168	0.12	0.113	0.121
ERCC3	0.186	0.192	0.192	0.191	0.194	0.191	0.186	0.189	0.19	0.192	0.193	0.151	0.192	0.19	0.185
USP6	0.158	0.154	0.157	0.192	0.144	0.155	0.125	0.16	0.163	0.151	0.152	0.172	0.163	0.15	0.144
ZNF720	0.244	0.25	0.179	0.222	0.143	0.17	0.221	0.257	0.253	0.237	0.251	0.26	0.28	0.294	0.283
OR6S1	0.321	0.345	0.359	0.368	0.374	0.371	0.291	0.385	0.316	0.392	0.394	0.227	0.363	0.36	0.384
ATG16L2	0.176	0.186	0.104	0.107	0.111	0.107	0.144	0.166	0.192	0.176	0.17	0.133	0.104	0.098	0.095
ABCB1	0.193	0.196	0.162	0.158	0.168	0.164	0.19	0.206	0.199	0.199	0.191	0.147	0.139	0.131	0.139
ABCB5	0.22	0.218	0.15	0.154	0.151	0.146	0.175	0.207	0.213	0.203	0.215	0.103	0.148	0.163	0.142
KDM4D	0.216	0.215	0.229	0.244	0.217	0.235	0.193	0.225	0.216	0.226	0.198	0.153	0.253	0.243	0.221
NKG7	0.171	0.174	0.102	0.092	0.105	0.115	0.19	0.172	0.182	0.189	0.168	0.036	0.093	0.094	0.09
INTS7	0.15	0.147	0.128	0.129	0.129	0.132	0.143	0.134	0.141	0.154	0.154	0.108	0.129	0.129	0.122
ST3GAL5	0.19	0.196	0.247	0.246	0.267	0.254	0.22	0.211	0.161	0.221	0.215	0.292	0.297	0.298	0.303
PSME2	0.237	0.224	0.178	0.193	0.192	0.153	0.273	0.255	0.214	0.253	0.236	0.234	0.269	0.234	0.251
CARD16	0.225	0.229	0.185	0.215	0.176	0.193	0.166	0.227	0.243	0.195	0.217	0.089	0.125	0.137	0.159
CD4	0.224	0.222	0.209	0.197	0.208	0.213	0.238	0.239	0.222	0.239	0.237	0.229	0.247	0.247	0.239
FCGR2A	0.201	0.191	0.194	0.211	0.212	0.223	0.238	0.165	0.2	0.157	0.16	0.155	0.193	0.192	0.197
HIST1H3B	0.078	0.074	0.117	0.134	0.159	0.129	0.056	0.066	0.069	0.053	0.062	0.065	0.185	0.196	0.172
PM20D1	0.288	0.28	0.242	0.26	0.26	0.237	0.23	0.302	0.271	0.296	0.296	0.204	0.229	0.211	0.222
CYP7B1	0.194	0.196	0.166	0.107	0.182	0.13	0.177	0.217	0.2	0.214	0.218	0.134	0.161	0.175	0.174
IFI44	0.143	0.153	0.178	0.152	0.191	0.18	0.162	0.171	0.149	0.161	0.178	0.21	0.209	0.204	0.198
SPAST	0.294	0.289	0.297	0.265	0.324	0.272	0.276	0.285	0.295	0.277	0.263	0.309	0.339	0.326	0.345
ARHGAP32	0.195	0.197	0.23	0.223	0.229	0.225	0.151	0.203	0.201	0.204	0.203	0.221	0.191	0.184	0.186
RPL32P3	0.133	0.141	0.047	0.025	0.066	0.052	0.137	0.145	0.14	0.153	0.147	0.218	0.121	0.114	0.107
CACNG1	0.201	0.197	0.183	0.193	0.191	0.187	0.216	0.192	0.206	0.204	0.209	0.105	0.189	0.191	0.163
FBXO18	0.164	0.167	0.192	0.191	0.194	0.193	0.165	0.172	0.172	0.176	0.175	0.121	0.181	0.185	0.158
NDUFB7	0.192	0.187	0.143	0.143	0.15	0.148	0.283	0.172	0.154	0.179	0.194	0.094	0.162	0.157	0.144
POLR3F	0.244	0.249	0.128	0.179	0.165	0.147	0.295	0.257	0.217	0.245	0.213	0.224	0.143	0.162	0.172
RAPGEF1	0.124	0.128	0.155	0.145	0.151	0.146	0.109	0.133	0.136	0.131	0.127	0.145	0.157	0.158	0.154
RAPGEF2	0.209	0.207	0.231	0.239	0.232	0.233	0.201	0.222	0.213	0.216	0.222	0.118	0.219	0.206	0.216
POLR3A	0.224	0.229	0.057	0.045	0.061	0.046	0.201	0.216	0.212	0.202	0.188	0.115	0.082	0.084	0.076
CCNT1	0.195	0.189	0.205	0.195	0.197	0.197	0.178	0.187	0.18	0.169	0.166	0.082	0.17	0.165	0.156
ADGRV1	0.191	0.195	0.165	0.169	0.175	0.171	0.177	0.207	0.194	0.204	0.189	0.19	0.186	0.187	0.182
CAV2	0.23	0.221	0.213	0.192	0.22	0.229	0.208	0.234	0.248	0.233	0.24	0.098	0.228	0.167	0.207
ZNF354A	0.124	0.129	0.256	0.321	0.254	0.283	0.189	0.139	0.128	0.111	0.095	0.228	0.336	0.326	0.304
GNPDA2	0.21	0.208	0.229	0.207	0.262	0.235	0.194	0.218	0.222	0.207	0.213	0.253	0.288	0.278	0.283
CLN3	0.18	0.182	0.212	0.255	0.183	0.211	0.18	0.192	0.181	0.181	0.183	0.161	0.157	0.154	0.213
CUL5	0.172	0.172	0.164	0.17	0.159	0.166	0.172	0.184	0.169	0.184	0.176	0.092	0.132	0.141	0.121
CCL11	0.128	0.123	0.229	0.249	0.215	0.248	0.186	0.182	0.142	0.171	0.172	0.219	0.212	0.212	0.217
OR2D2	0.19	0.174	0.136	0.139	0.136	0.15	0.106	0.186	0.189	0.182	0.178	0.136	0.151	0.162	0.148
IDH1	0.116	0.123	0.049	0.054	0.063	0.065	0.084	0.153	0.115	0.157	0.17	0.045	0.056	0.068	0.055
WNK1	0.198	0.2	0.196	0.2	0.201	0.205	0.194	0.202	0.193	0.194	0.19	0.124	0.199	0.2	0.197
FASLG	0.127	0.127	0.125	0.089	0.128	0.131	0.161	0.132	0.118	0.142	0.141	0.097	0.127	0.122	0.124
C10ORF71	0.145	0.146	0.177	0.178	0.173	0.185	0.139	0.158	0.159	0.16	0.162	0.182	0.171	0.18	0.167
XAF1	0.204	0.203	0.114	0.152	0.154	0.131	0.204	0.2	0.207	0.228	0.226	0.189	0.176	0.181	0.19
CXCL9	0.053	0.052	0.304	0.311	0.298	0.273	0.141	0.081	0.071	0.085	0.114	0.307	0.311	0.315	0.311
PIP5K1C	0.22	0.213	0.182	0.171	0.162	0.164	0.218	0.217	0.226	0.214	0.225	0.154	0.194	0.191	0.194
RNF212	0.199	0.208	0.133	0.174	0.181	0.14	0.188	0.21	0.214	0.217	0.21	0.17	0.149	0.171	0.14
MED28	0.259	0.265	0.256	0.215	0.25	0.245	0.195	0.274	0.26	0.28	0.251	0.097	0.278	0.276	0.296
PNRC1	0.153	0.164	0.238	0.267	0.204	0.246	0.17	0.17	0.168	0.201	0.182	0.195	0.249	0.254	0.232
KAT2A	0.096	0.077	0.155	0.126	0.185	0.149	0.22	0.116	0.089	0.099	0.124	0.124	0.161	0.218	0.164
CD209	0.234	0.24	0.104	0.102	0.101	0.103	0.195	0.206	0.251	0.209	0.221	0.107	0.115	0.12	0.118
CRTC3	0.25	0.255	0.176	0.202	0.182	0.164	0.224	0.249	0.26	0.246	0.25	0.185	0.175	0.17	0.178
CRTC2	0.193	0.213	0.21	0.217	0.251	0.225	0.222	0.183	0.164	0.137	0.096	0.227	0.259	0.275	0.245
IFNGR1	0.119	0.122	0.129	0.16	0.18	0.177	0.176	0.123	0.116	0.118	0.116	0.211	0.188	0.181	0.189
ZFP90	0.221	0.247	0.206	0.144	0.22	0.136	0.258	0.214	0.222	0.217	0.218	0.134	0.183	0.177	0.201
CLNS1A	0.306	0.323	0.137	0.169	0.127	0.13	0.295	0.26	0.287	0.263	0.253	0.177	0.152	0.164	0.186
CLDND1	0.065	0.068	0.116	0.141	0.101	0.136	0.061	0.099	0.087	0.099	0.096	0.218	0.136	0.154	0.16
PC	0.175	0.162	0.161	0.152	0.167	0.151	0.145	0.199	0.182	0.198	0.21	0.164	0.14	0.104	0.097
HLA-DQB1	0.242	0.27	0.21	0.244	0.196	0.213	0.21	0.262	0.186	0.226	0.21	0.21	0.196	0.21	0.195
CTLA4	0.184	0.178	0.232	0.23	0.217	0.218	0.155	0.228	0.199	0.236	0.206	0.193	0.178	0.155	0.156
ERP27	0.252	0.251	0.294	0.218	0.315	0.263	0.304	0.279	0.269	0.282	0.255	0.101	0.229	0.245	0.192
ATG12	0.214	0.229	0.098	0.079	0.098	0.08	0.186	0.232	0.231	0.23	0.243	0.107	0.11	0.118	0.112
RSL1D1	0.186	0.185	0.222	0.256	0.232	0.254	0.167	0.186	0.184	0.162	0.169	0.201	0.232	0.225	0.242
KIR3DL1	0.361	0.255	0	0	0	0	0.018	0.087	0.128	0.088	0.119	0	0	0	0
PHF20	0.178	0.182	0.086	0.089	0.089	0.07	0.159	0.188	0.189	0.179	0.186	0.065	0.145	0.136	0.144
CCDC134	0.128	0.135	0.157	0.156	0.162	0.158	0.144	0.146	0.142	0.137	0.134	0.129	0.17	0.174	0.191
LRBA	0.185	0.186	0.132	0.135	0.126	0.13	0.171	0.196	0.188	0.19	0.193	0.156	0.159	0.184	0.155
MOS	0.243	0.22	0.192	0.167	0.321	0.192	0.214	0.207	0.235	0.251	0.246	0.004	0.093	0.082	0.092
PHF3	0.147	0.14	0.143	0.125	0.112	0.147	0.147	0.131	0.144	0.13	0.14	0.162	0.162	0.147	0.145
AGBL5	0.154	0.161	0.245	0.239	0.279	0.255	0.236	0.215	0.162	0.205	0.228	0.136	0.214	0.236	0.172
VWC2L	0.233	0.234	0.173	0.171	0.169	0.174	0.203	0.24	0.227	0.227	0.234	0.156	0.157	0.16	0.163
SEC14L1	0.179	0.179	0.203	0.201	0.2	0.201	0.177	0.184	0.178	0.182	0.177	0.2	0.2	0.198	0.202
CTDP1	0.189	0.191	0.287	0.245	0.271	0.289	0.2	0.255	0.262	0.259	0.274	0.289	0.263	0.28	0.27
EVI5L	0.205	0.203	0.2	0.202	0.204	0.205	0.202	0.201	0.204	0.216	0.211	0.213	0.145	0.107	0.121
CCR2	0.161	0.182	0.133	0.116	0.17	0.159	0.166	0.178	0.196	0.172	0.162	0.19	0.153	0.142	0.156
PDE7A	0.149	0.15	0.101	0.089	0.119	0.114	0.129	0.152	0.156	0.14	0.143	0.03	0.069	0.054	0.045
ZNF536	0.218	0.219	0.179	0.171	0.19	0.182	0.201	0.219	0.222	0.219	0.22	0.204	0.197	0.202	0.196
PHF12	0.176	0.161	0.118	0.134	0.125	0.119	0.148	0.179	0.188	0.164	0.145	0.071	0.194	0.206	0.167
STAT1	0.218	0.223	0.162	0.118	0.179	0.155	0.196	0.224	0.222	0.225	0.224	0.195	0.163	0.156	0.147
ZNF385D	0.188	0.186	0.192	0.188	0.198	0.194	0.177	0.198	0.189	0.196	0.192	0.184	0.187	0.188	0.187
FHL3	0.191	0.174	0.194	0.206	0.203	0.191	0.201	0.182	0.19	0.199	0.207	0.087	0.179	0.187	0.178
NAV2	0.217	0.22	0.159	0.154	0.156	0.156	0.2	0.221	0.221	0.217	0.215	0.17	0.176	0.177	0.172
DPM1	0.144	0.148	0.065	0.07	0.069	0.054	0.115	0.177	0.153	0.177	0.155	0.057	0.061	0.068	0.075
PDHA2	0.174	0.175	0.151	0.115	0.156	0.129	0.126	0.183	0.191	0.182	0.197	0.097	0.183	0.192	0.176
LY6D	0.226	0.228	0.184	0.144	0.183	0.162	0.203	0.2	0.203	0.248	0.238	0.209	0.181	0.167	0.157
RABEPK	0.22	0.224	0.222	0.151	0.222	0.196	0.197	0.223	0.226	0.215	0.236	0.204	0.205	0.194	0.192
IL10	0.256	0.257	0.275	0.263	0.28	0.293	0.245	0.278	0.272	0.292	0.279	0.155	0.275	0.256	0.265
WNT1	0.178	0.188	0.128	0.146	0.146	0.14	0.153	0.17	0.203	0.178	0.194	0.113	0.117	0.126	0.124
IL13	0.193	0.196	0.076	0.129	0.077	0.095	0.181	0.197	0.198	0.226	0.194	0.151	0.119	0.118	0.087
IL6	0.103	0.113	0.148	0.163	0.142	0.163	0.127	0.134	0.114	0.15	0.154	0.043	0.137	0.156	0.161
IL4	0.204	0.205	0.09	0.191	0.092	0.094	0.261	0.229	0.222	0.233	0.242	0.124	0.146	0.119	0.101
IL2	0.092	0.098	0.183	0.179	0.174	0.176	0.113	0.111	0.097	0.1	0.101	0.16	0.173	0.162	0.166
TMTC1	0.198	0.2	0.189	0.194	0.187	0.174	0.198	0.207	0.207	0.196	0.2	0.21	0.172	0.161	0.165
HIBCH	0.304	0.305	0.238	0.156	0.216	0.201	0.286	0.31	0.3	0.306	0.291	0.317	0.228	0.181	0.223
PPIA	0.246	0.245	0.164	0.137	0.155	0.144	0.246	0.23	0.262	0.167	0.157	0.121	0.222	0.243	0.226
HMGXB3	0.186	0.187	0.138	0.115	0.174	0.15	0.158	0.2	0.196	0.19	0.186	0.164	0.138	0.156	0.124
BAHD1	0.159	0.148	0.185	0.175	0.175	0.175	0.155	0.172	0.169	0.172	0.178	0.112	0.17	0.183	0.177
MAP4	0.238	0.248	0.177	0.175	0.196	0.213	0.191	0.261	0.255	0.259	0.243	0.172	0.216	0.182	0.242
SPTBN1	0.185	0.191	0.171	0.134	0.16	0.166	0.183	0.18	0.187	0.177	0.184	0.149	0.161	0.164	0.164
LYPD4	0.131	0.123	0.404	0.378	0.391	0.403	0.134	0.144	0.131	0.088	0.133	0.399	0.374	0.344	0.334
RNF170	0.186	0.19	0.054	0.065	0.041	0.06	0.196	0.164	0.17	0.167	0.203	0.055	0.073	0.076	0.065
CHORDC1	0.19	0.199	0.273	0.284	0.268	0.293	0.224	0.178	0.229	0.172	0.136	0.285	0.296	0.277	0.264
FAS	0.239	0.238	0.293	0.299	0.31	0.279	0.269	0.222	0.22	0.24	0.251	0.36	0.322	0.314	0.284
ANKRD30A	0.2	0.215	0.249	0.277	0.266	0.257	0.18	0.219	0.212	0.23	0.228	0.161	0.125	0.141	0.142
COG3	0.227	0.227	0.134	0.177	0.138	0.145	0.154	0.233	0.226	0.232	0.229	0.144	0.139	0.14	0.168
ATG7	0.186	0.187	0.196	0.163	0.199	0.177	0.18	0.202	0.187	0.2	0.195	0.14	0.185	0.203	0.187
AOAH	0.213	0.213	0.208	0.203	0.208	0.203	0.198	0.221	0.215	0.222	0.226	0.171	0.203	0.209	0.195
CYP4A22	0.216	0.273	0.18	0.202	0.186	0.205	0.296	0.228	0.16	0.25	0.233	0.273	0.318	0.324	0.336
ANXA1	0.172	0.181	0.135	0.139	0.13	0.14	0.125	0.194	0.195	0.2	0.186	0.106	0.143	0.132	0.111
STAC2	0.23	0.227	0.101	0.084	0.106	0.105	0.173	0.243	0.241	0.247	0.241	0.056	0.086	0.085	0.087
PIGH	0.226	0.23	0.2	0.19	0.204	0.209	0.249	0.22	0.237	0.235	0.228	0.216	0.204	0.226	0.211
PIGK	0.152	0.15	0.113	0.105	0.118	0.11	0.115	0.175	0.159	0.177	0.173	0.147	0.151	0.153	0.147
GLTSCR1	0.207	0.208	0.233	0.233	0.231	0.23	0.184	0.22	0.209	0.217	0.218	0.205	0.223	0.236	0.228
PIGY	0.194	0.183	0.07	0.066	0.08	0.089	0.24	0.218	0.23	0.222	0.212	0.101	0.111	0.112	0.112
ZNF804A	0.202	0.208	0.139	0.115	0.155	0.142	0.171	0.21	0.214	0.207	0.209	0.06	0.12	0.125	0.125
MCM8	0.152	0.149	0.045	0.05	0.056	0.052	0.244	0.13	0.152	0.146	0.144	0.107	0.092	0.086	0.092
TFDP2	0.143	0.142	0.153	0.161	0.148	0.142	0.13	0.16	0.156	0.165	0.162	0.129	0.118	0.087	0.085
PURA	0.377	0.404	0.187	0.111	0.171	0.182	0.339	0.342	0.349	0.405	0.366	0.028	0.261	0.218	0.252
BCL9	0.204	0.199	0.118	0.114	0.128	0.13	0.197	0.216	0.21	0.204	0.211	0.19	0.142	0.134	0.109
A4GALT	0.194	0.194	0.227	0.242	0.232	0.224	0.21	0.196	0.199	0.177	0.172	0.193	0.232	0.24	0.235
HLA-DQA1	0.222	0.23	0.162	0.189	0.158	0.157	0.159	0.185	0.172	0.168	0.151	0.172	0.194	0.193	0.187
ZNF512B	0.197	0.196	0.188	0.202	0.184	0.187	0.223	0.199	0.168	0.189	0.178	0.038	0.191	0.202	0.204
GOLPH3	0.191	0.179	0.109	0.116	0.119	0.105	0.13	0.192	0.184	0.18	0.192	0.132	0.124	0.112	0.122
GLRX3	0.14	0.15	0.164	0.146	0.159	0.165	0.139	0.143	0.145	0.152	0.151	0.122	0.15	0.152	0.152
AKT1	0.2	0.201	0.147	0.149	0.151	0.152	0.155	0.215	0.217	0.213	0.204	0.157	0.197	0.2	0.193
DARC	0.039	0.04	0.418	0.455	0.348	0.429	0.375	0.002	0.071	0	0	0.077	0.347	0.353	0.388
PKD1L2	0.219	0.225	0.168	0.173	0.167	0.175	0.21	0.224	0.217	0.216	0.215	0.182	0.182	0.189	0.194
MMADHC	0.161	0.186	0.213	0.135	0.191	0.181	0.242	0.201	0.164	0.186	0.227	0.098	0.187	0.177	0.196
OAS1	0.078	0.082	0.289	0.228	0.308	0.294	0.094	0.083	0.077	0.071	0.069	0.198	0.229	0.238	0.253
OAS2	0.141	0.138	0.187	0.165	0.189	0.187	0.133	0.153	0.145	0.146	0.135	0.12	0.15	0.147	0.158
FLII	0.159	0.147	0.151	0.148	0.143	0.148	0.144	0.16	0.162	0.154	0.168	0.166	0.12	0.13	0.137
ZNF785	0.18	0.193	0.017	0.015	0.016	0.018	0.164	0.162	0.167	0.216	0.187	0	0.004	0.006	0.006
FNTA	0.252	0.252	0.074	0.09	0.05	0.082	0.238	0.25	0.237	0.248	0.277	0.099	0.13	0.135	0.123
FAM76B	0.099	0.103	0.197	0.202	0.244	0.245	0.105	0.128	0.098	0.14	0.151	0.161	0.134	0.139	0.161
PSORS1C1	0.09	0.083	0.156	0.155	0.17	0.168	0.071	0.024	0.036	0.061	0.04	0.125	0.171	0.163	0.144
COG2	0.157	0.157	0.155	0.167	0.162	0.164	0.158	0.164	0.158	0.164	0.168	0.145	0.162	0.156	0.174
PSORS1C3	0.128	0.142	0.262	0.33	0.28	0.229	0.271	0.244	0.233	0.265	0.269	0.292	0.316	0.32	0.297
OASL	0.21	0.213	0.174	0.181	0.18	0.179	0.203	0.192	0.205	0.186	0.201	0.146	0.159	0.154	0.142
COG4	0.258	0.237	0.106	0.096	0.113	0.086	0.145	0.284	0.281	0.327	0.317	0.1	0.074	0.064	0.086
IGHMBP2	0.159	0.165	0.226	0.212	0.223	0.228	0.172	0.175	0.144	0.166	0.142	0.135	0.182	0.17	0.18
PRF1	0.128	0.113	0.129	0.123	0.138	0.14	0.109	0.12	0.127	0.113	0.105	0.117	0.122	0.112	0.115
KLHL1	0.254	0.249	0.167	0.18	0.167	0.161	0.22	0.254	0.255	0.256	0.253	0.152	0.165	0.165	0.158
OR51A4	0.19	0.207	0.179	0.227	0.149	0.149	0.207	0.141	0.211	0.118	0.109	0.101	0.22	0.22	0.212
CX3CR1	0.17	0.165	0.167	0.169	0.169	0.171	0.18	0.176	0.171	0.164	0.162	0.095	0.15	0.155	0.163
ARPC1A	0.164	0.157	0.045	0.074	0.076	0.057	0.143	0.197	0.162	0.199	0.2	0.155	0.176	0.173	0.125
DPCR1	0.178	0.198	0.093	0.058	0.114	0.073	0.146	0.21	0.171	0.27	0.207	0.052	0.051	0.032	0.056
MKRN2	0.2	0.215	0.256	0.257	0.258	0.262	0.176	0.198	0.211	0.196	0.193	0.068	0.139	0.117	0.114
ATP8B4	0.17	0.174	0.185	0.184	0.187	0.19	0.169	0.18	0.17	0.175	0.174	0.121	0.172	0.162	0.175
TLR9	0.26	0.277	0.246	0.247	0.231	0.232	0.225	0.262	0.274	0.263	0.266	0.202	0.225	0.214	0.225
ZBTB2	0.242	0.238	0.158	0.131	0.145	0.14	0.199	0.245	0.245	0.233	0.226	0.204	0.206	0.2	0.175
HLA-C	0.226	0.206	0.138	0.153	0.134	0.147	0.151	0.134	0.176	0.128	0.147	0.144	0.129	0.137	0.13
HLA-B	0.197	0.204	0.17	0.17	0.201	0.152	0.206	0.233	0.216	0.279	0.248	0.165	0.199	0.214	0.218
HLA-A	0.171	0.18	0.135	0.174	0.138	0.144	0.134	0.121	0.123	0.145	0.13	0.126	0.12	0.133	0.123
HLA-G	0.141	0.116	0.223	0.326	0.217	0.265	0.036	0.133	0.082	0.12	0.133	0.182	0.108	0.108	0.083
NGLY1	0.203	0.199	0.105	0.161	0.108	0.1	0.199	0.221	0.205	0.206	0.203	0.049	0.174	0.172	0.138
RSAD2	0.251	0.239	0.133	0.126	0.135	0.123	0.242	0.228	0.247	0.236	0.234	0.089	0.16	0.158	0.147
FAM200B	0.245	0.245	0.217	0.208	0.215	0.208	0.228	0.253	0.231	0.235	0.227	0.156	0.182	0.161	0.2
KBTBD7	0.081	0.066	0.067	0.1	0.067	0.076	0.188	0.069	0.082	0.085	0.065	0.16	0.154	0.161	0.127
ASXL2	0.244	0.238	0.21	0.186	0.203	0.21	0.241	0.217	0.212	0.217	0.224	0.064	0.193	0.184	0.196
TNXB	0.078	0.068	0.06	0.005	0.049	0.045	0.137	0.134	0.128	0.083	0.139	0.001	0	0	0
TMEM182	0.209	0.218	0.264	0.274	0.258	0.257	0.201	0.241	0.233	0.233	0.232	0.254	0.258	0.254	0.242
TMEM181	0.227	0.234	0.239	0.23	0.243	0.239	0.235	0.246	0.234	0.242	0.241	0.181	0.231	0.23	0.232
NIPSNAP3B	0.152	0.153	0.193	0.22	0.174	0.193	0.145	0.155	0.157	0.163	0.175	0.249	0.222	0.222	0.2
DCHS2	0.223	0.225	0.199	0.207	0.204	0.204	0.206	0.24	0.221	0.226	0.221	0.164	0.225	0.213	0.223
LNX2	0.202	0.207	0.221	0.215	0.22	0.223	0.182	0.198	0.207	0.192	0.18	0.238	0.216	0.212	0.23
IL4R	0.221	0.22	0.176	0.157	0.166	0.172	0.201	0.224	0.219	0.221	0.215	0.164	0.165	0.166	0.159
EFEMP1	0.198	0.192	0.171	0.151	0.178	0.182	0.161	0.196	0.204	0.2	0.188	0.119	0.213	0.214	0.221
ANKRD22	0.18	0.181	0.189	0.234	0.219	0.218	0.195	0.19	0.196	0.181	0.174	0.184	0.209	0.213	0.206
STT3A	0.26	0.253	0.129	0.173	0.179	0.155	0.282	0.249	0.256	0.253	0.253	0.167	0.165	0.154	0.172
LSM3	0.217	0.231	0.253	0.229	0.253	0.257	0.176	0.242	0.201	0.217	0.191	0.132	0.223	0.231	0.196
KIF3C	0.226	0.209	0.106	0.125	0.131	0.143	0.217	0.23	0.229	0.227	0.22	0.03	0.152	0.133	0.114
ETHE1	0.176	0.18	0.212	0.212	0.199	0.212	0.123	0.182	0.171	0.165	0.192	0.196	0.19	0.192	0.205
PRDM14	0.211	0.206	0.151	0.151	0.161	0.156	0.202	0.213	0.21	0.209	0.228	0.222	0.2	0.189	0.181
TUBAL3	0.187	0.208	0.187	0.176	0.176	0.182	0.173	0.183	0.152	0.188	0.147	0.142	0.241	0.23	0.224
MGAT1	0.204	0.184	0.117	0.107	0.118	0.109	0.224	0.219	0.162	0.158	0.202	0.203	0.184	0.187	0.191
SDC1	0.192	0.196	0.222	0.183	0.231	0.194	0.157	0.187	0.166	0.187	0.202	0.123	0.189	0.183	0.205
TMEFF2	0.195	0.192	0.183	0.158	0.18	0.181	0.195	0.201	0.197	0.198	0.197	0.154	0.165	0.178	0.18
HOXD12	0.359	0.344	0.313	0.29	0.312	0.324	0.37	0.378	0.343	0.364	0.315	0.115	0.253	0.183	0.223
NUP153	0.123	0.134	0.147	0.157	0.109	0.137	0.108	0.14	0.129	0.14	0.141	0.157	0.104	0.103	0.085
NUP155	0.136	0.139	0.073	0.076	0.072	0.07	0.122	0.139	0.134	0.145	0.149	0.074	0.093	0.087	0.097
KLHDC2	0.138	0.115	0.046	0.059	0.054	0.056	0.118	0.148	0.127	0.147	0.212	0.021	0.041	0.038	0.04
EPHA5	0.176	0.178	0.174	0.179	0.18	0.177	0.166	0.182	0.178	0.178	0.176	0.169	0.176	0.173	0.174
DEFB1	0.166	0.183	0.21	0.197	0.193	0.229	0.198	0.158	0.173	0.149	0.121	0.178	0.198	0.189	0.178
NCOR2	0.17	0.171	0.152	0.151	0.15	0.146	0.154	0.177	0.174	0.177	0.17	0.161	0.165	0.163	0.166
TNPO3	0.257	0.258	0.257	0.272	0.264	0.282	0.22	0.267	0.234	0.299	0.296	0.305	0.267	0.261	0.274
AKR1B10	0.256	0.256	0.239	0.241	0.206	0.254	0.256	0.245	0.283	0.259	0.232	0.208	0.244	0.246	0.243
TMED2	0.19	0.169	0.182	0.12	0.175	0.178	0.188	0.205	0.195	0.21	0.241	0.048	0.172	0.157	0.178
IQUB	0.204	0.198	0.206	0.232	0.198	0.198	0.194	0.181	0.198	0.2	0.183	0.231	0.187	0.199	0.163
AP2M1	0.2	0.199	0.193	0.161	0.19	0.188	0.148	0.222	0.203	0.218	0.212	0.179	0.193	0.196	0.196
TRMT5	0.145	0.165	0.057	0.062	0.065	0.048	0.182	0.158	0.159	0.226	0.149	0.256	0.279	0.301	0.283
SPTAN1	0.195	0.185	0.037	0.043	0.037	0.033	0.143	0.186	0.193	0.181	0.173	0.141	0.085	0.081	0.084
HNRNPF	0.183	0.191	0.154	0.168	0.171	0.163	0.213	0.197	0.191	0.194	0.197	0.154	0.215	0.216	0.226
LRRC8D	0.178	0.175	0.137	0.123	0.13	0.13	0.183	0.176	0.178	0.164	0.168	0.087	0.123	0.131	0.128
TIAM2	0.219	0.215	0.22	0.216	0.224	0.216	0.201	0.22	0.213	0.213	0.205	0.22	0.219	0.226	0.209
XKR4	0.191	0.191	0.175	0.183	0.175	0.177	0.195	0.197	0.182	0.196	0.185	0.193	0.177	0.179	0.174
YTHDC2	0.245	0.264	0.197	0.18	0.167	0.185	0.208	0.242	0.251	0.237	0.262	0.154	0.142	0.149	0.143
CCL17	0.189	0.209	0.177	0.161	0.151	0.148	0.195	0.181	0.2	0.187	0.174	0.178	0.191	0.189	0.19
CCL18	0.198	0.248	0.335	0.298	0.28	0.306	0.187	0.166	0.138	0.173	0.154	0.27	0.306	0.32	0.303
ACTRT2	0.175	0.157	0.112	0.09	0.104	0.144	0.215	0.183	0.181	0.168	0.13	0.26	0.085	0.061	0.072
TRIB1	0.213	0.2	0.198	0.206	0.206	0.209	0.212	0.211	0.218	0.21	0.218	0.195	0.201	0.192	0.195
MKI67	0.218	0.213	0.194	0.188	0.194	0.2	0.208	0.208	0.192	0.214	0.25	0.206	0.189	0.189	0.158
VCAN	0.201	0.193	0.187	0.186	0.19	0.176	0.182	0.203	0.204	0.21	0.205	0.19	0.192	0.186	0.185
IL12B	0.259	0.27	0.252	0.236	0.249	0.229	0.185	0.285	0.245	0.263	0.256	0.356	0.286	0.325	0.293
IL12A	0.18	0.186	0.224	0.222	0.224	0.223	0.157	0.211	0.193	0.212	0.212	0.14	0.233	0.234	0.234
ADAM10	0.206	0.202	0.129	0.176	0.116	0.114	0.194	0.215	0.212	0.228	0.222	0.199	0.218	0.21	0.192
DDOST	0.235	0.247	0.269	0.277	0.26	0.273	0.253	0.233	0.254	0.236	0.22	0.2	0.224	0.24	0.235
ADAM7	0.22	0.219	0.129	0.167	0.154	0.147	0.198	0.25	0.231	0.25	0.24	0.188	0.195	0.191	0.185
MBL2	0.29	0.305	0.21	0.184	0.22	0.213	0.239	0.295	0.314	0.315	0.277	0.196	0.226	0.244	0.226
SERPINA1	0.159	0.149	0.352	0.352	0.348	0.355	0.226	0.168	0.183	0.174	0.199	0.301	0.327	0.335	0.327
ANKRD6	0.191	0.194	0.19	0.186	0.192	0.193	0.19	0.189	0.194	0.184	0.188	0.183	0.227	0.223	0.219
MEPE	0.184	0.187	0.149	0.149	0.158	0.152	0.152	0.178	0.176	0.186	0.206	0.097	0.143	0.146	0.145
KCNK9	0.186	0.187	0.17	0.168	0.176	0.173	0.174	0.2	0.176	0.199	0.202	0.162	0.189	0.185	0.185
PLOD3	0.209	0.205	0.118	0.108	0.13	0.118	0.195	0.212	0.197	0.211	0.213	0.167	0.213	0.216	0.216
CMPK2	0.243	0.247	0.04	0.038	0.047	0.042	0.24	0.196	0.237	0.192	0.23	0.034	0.026	0.026	0.029
ANKRD9	0.233	0.236	0.244	0.248	0.24	0.245	0.212	0.237	0.229	0.245	0.23	0.254	0.26	0.249	0.265
UBQLN4	0.143	0.142	0.181	0.161	0.186	0.172	0.107	0.179	0.151	0.169	0.174	0.078	0.161	0.197	0.161
DOK6	0.205	0.204	0.191	0.186	0.195	0.189	0.205	0.21	0.203	0.199	0.206	0.158	0.19	0.189	0.189
TTLL10	0.158	0.151	0.126	0.115	0.095	0.109	0.139	0.175	0.17	0.182	0.17	0.197	0.199	0.206	0.197
ZNF791	0.213	0.216	0.22	0.217	0.213	0.216	0.19	0.227	0.222	0.228	0.22	0.106	0.262	0.246	0.203
PDIA6	0.188	0.203	0.236	0.266	0.258	0.26	0.211	0.2	0.197	0.188	0.185	0.225	0.229	0.215	0.233
NUP160	0.178	0.169	0.235	0.22	0.25	0.261	0.178	0.182	0.165	0.166	0.154	0.246	0.239	0.258	0.234
TMEM163	0.193	0.196	0.152	0.149	0.181	0.144	0.17	0.189	0.19	0.183	0.19	0.142	0.18	0.178	0.181
GPC5	0.213	0.21	0.173	0.167	0.182	0.176	0.191	0.219	0.211	0.219	0.221	0.165	0.179	0.171	0.181
USP18	0.259	0.26	0.125	0.123	0.115	0.124	0.24	0.259	0.245	0.245	0.238	0.133	0.159	0.148	0.173
ABCC12	0.204	0.195	0.016	0.015	0.019	0.017	0.187	0.175	0.15	0.192	0.214	0.003	0.008	0.005	0.008
FOXN3	0.194	0.193	0.176	0.165	0.173	0.174	0.187	0.197	0.196	0.195	0.195	0.177	0.186	0.188	0.191
GRIN2A	0.215	0.212	0.179	0.175	0.184	0.183	0.204	0.22	0.214	0.224	0.226	0.137	0.157	0.152	0.165
