# Supplementary material for: Whole genome sequencing reveals population diversity and variation in HIV-1 specific host genes
Source: Front Genet. 2023 Dec 20;14:1290624. doi: 10.3389/fgene.2023.1290624 (PMC10765519; doi:10.3389/fgene.2023.1290624)
Supplement: Supplementary file 10 [file Table7.XLSX]

## Sheet: Table S4
Supplementary Table 7. Some of the genes harboured additional novel loss-of-function (LOF) variants according to snpEFF
CHR	POS	cDNA change	Amino acid change	Gene	Function	Exonic Function
chr1	8867250	exon6:c.310_311ins	p.S104_K105delinsYGWNRKX	ENO1	exonic	stopgain
chr2	195864156	exon41:c.G7499A	p.W2500X	DNAH7	exonic	stopgain
chr2	195934647	exon21:c.C3415T	p.Q1139X	DNAH7	exonic	stopgain
chr2	195957399	exon19:c.2939_2940insAG	p.W980_L981delinsX	DNAH7	exonic	stopgain
chr4	150850846	exon24:c.3881_3882insGG	p.G1294fs	LRBA	exonic	FS insertion
chr4	154259570	exon20:c.5398dupC	p.Q1800fs	DCHS2	exonic	FS insertion
chr5	83522305	exon7:c.4000dupA	p.K1333fs	VCAN	exonic	FS insertion
chr5	90694548	.	.	ADGRV1	exonic	FS insertion
chr5	91072605	.	.	ADGRV1	splicing	.
chr7	134533016	.	.	AKR1B10	exonic	FS deletion
chr8	24476506	.	.	ADAM7	splicing	.
chr8	24500897	.	.	ADAM7	splicing	.
